# Supplementary material for: Plasticity of fruit and oil traits in olive among different environments
Source: PubMed Central journal article supplement (PMC6861299; doi:10.1038/s41598-019-53169-3), 2019-11-18
Supplement: 41598_2019_53169_MOESM1_ESM.pdf [file 41598_2019_53169_MOESM1_ESM.pdf]

## Supplementary data

### Plasticity of fruit and oil traits in olive among different environments

**Soraya Mousavi<sup>1,2</sup>, Raul de la Rosa<sup>3</sup>, Abdelmajid Moukhli<sup>4</sup>, Milad El Riachy<sup>5</sup>, Roberto Mariotti<sup>2</sup>, Mariela Torres<sup>6</sup>, Pierluigi Pierantozzi<sup>6</sup>, Vitale Stanzione<sup>1</sup>, Valerio Mastio<sup>1</sup>, Hayat Zaher<sup>4</sup>, Abderraouf El Antari<sup>4</sup>, Salam Ayoub<sup>7</sup>, Faten Dandachi<sup>5</sup>, Hiyam Youssef<sup>5</sup>, Nikolas Aggelou<sup>8</sup>, Cibeles Contreras<sup>6</sup>, Damián Maestri<sup>9</sup>, Angelina Belaj<sup>3</sup>, Marina Bufacchi<sup>1</sup>, Luciana Baldoni<sup>2</sup>, Lorenzo Leon<sup>3</sup>**

<sup>1</sup>CNR - Institute for Agricultural and Forest Systems of the Mediterranean, 06128 Perugia, Italy. <sup>2</sup>CNR - Institute of Biosciences and Bioresources, 06128 Perugia, Italy. <sup>3</sup>IFAPA - Centro Alameda del Obispo, Córdoba, Spain. <sup>4</sup>INRA - CRRRA, Marrakech-Safi, BP 533, Marrakech, Morocco. <sup>5</sup>LARI - Lebanese Agricultural Research Institute Tal Amara, Bekaa, Lebanon. <sup>6</sup>Estación Experimental Agropecuaria San Juan (EEA INTA San Juan), and CONICET. Ing. Marcos Zalazar (Calle 11) y Vidart. Villa Aberastain, Pocito, 5427 San Juan, Argentina. <sup>7</sup>National Agricultural Research Center (NARC), Baqa, 19381 Jordan. <sup>8</sup>MAICH - Department of Horticultural Genetics and Biotechnology, 73100 Chania-Crete, Greece. <sup>9</sup>Instituto Multidisciplinario de Biología Vegetal (IMBIV, CONICET-UNC). Av. Vélez Sarsfield 1611, X5016GCA Córdoba, Argentina

*Author for correspondence: Marina Bufacchi*

Email: [marina.bufacchi@cnr.it](mailto:marina.bufacchi@cnr.it)

Tel: +39 075 5015538

*Email addresses:*

*Soraya Mousavi:* [soraya.mousavi@ibbr.cnr.it](mailto:soraya.mousavi@ibbr.cnr.it)

*Raul de la Rosa:* [raul.rosa@juntadeandalucia.es](mailto:raul.rosa@juntadeandalucia.es)

*Abdelmajid Moukhli:* [moukhli.abdelmajid@gmail.com](mailto:moukhli.abdelmajid@gmail.com)

*Milad El Riachy:* [mriachy@lari.gov.lb](mailto:mriachy@lari.gov.lb)

*Roberto Mariotti:* [roberto.mariotti@ibbr.cnr.it](mailto:roberto.mariotti@ibbr.cnr.it)

*Mariela Torres:* [torres.mariela@inta.gob.ar](mailto:torres.mariela@inta.gob.ar)

*Pierluigi Pierantozzi:* [pierantozzi.pierluigi@inta.gob.ar](mailto:pierantozzi.pierluigi@inta.gob.ar)

*Vitale Stanzione:* [vitale.stanzione@cnr.it](mailto:vitale.stanzione@cnr.it)

*Valerio Mastio:* [valerio.mastio@hotmail.it](mailto:valerio.mastio@hotmail.it)

*Hayat Zaher:* [hayatzaher@yahoo.fr](mailto:hayatzaher@yahoo.fr)

*Abderraouf El Antari: [aelantari@yahoo.fr](mailto:aelantari@yahoo.fr)*

*Salam Ayoub: [salam.ayoub@narc.gov.jo](mailto:salam.ayoub@narc.gov.jo)*

*Faten Dandachi: [fatendandachi@hotmail.com](mailto:fatendandachi@hotmail.com)*

*Hiyam Youssef: [hiyamy@hotmail.com](mailto:hiyamy@hotmail.com)*

*Nikolas Aggelou: [aggelou.nikolas@gmail.com](mailto:aggelou.nikolas@gmail.com)*

*Cibeles Contereras: [contreras.cibeles@inta.gob.ar](mailto:contreras.cibeles@inta.gob.ar)*

*Damián Maestri: [dmaestri@unc.edu.ar](mailto:dmaestri@unc.edu.ar)*

*Angelina Belaj: [angelina.belaj@juntadeandalucia.es](mailto:angelina.belaj@juntadeandalucia.es)*

*Marina Bufacchi: [marina.bufacchi@cnr.it](mailto:marina.bufacchi@cnr.it)*

*Luciana Baldoni: [luciana.baldoni@ibbr.cnr.it](mailto:luciana.baldoni@ibbr.cnr.it)*

*Lorenzo Leon: [lorenzo.leon@juntadeandalucia.es](mailto:lorenzo.leon@juntadeandalucia.es)*

**Supplementary Figure S1 and S2; Supplementary Tables S1-S7**

**Figure S1** The best linear unbiased prediction (BLUP) graph for the effect of genotype on OCFrDW (oil content in fruit dry weight) vs OLP (oleic/(linoleic + palmitic) acids ratio), interactions.

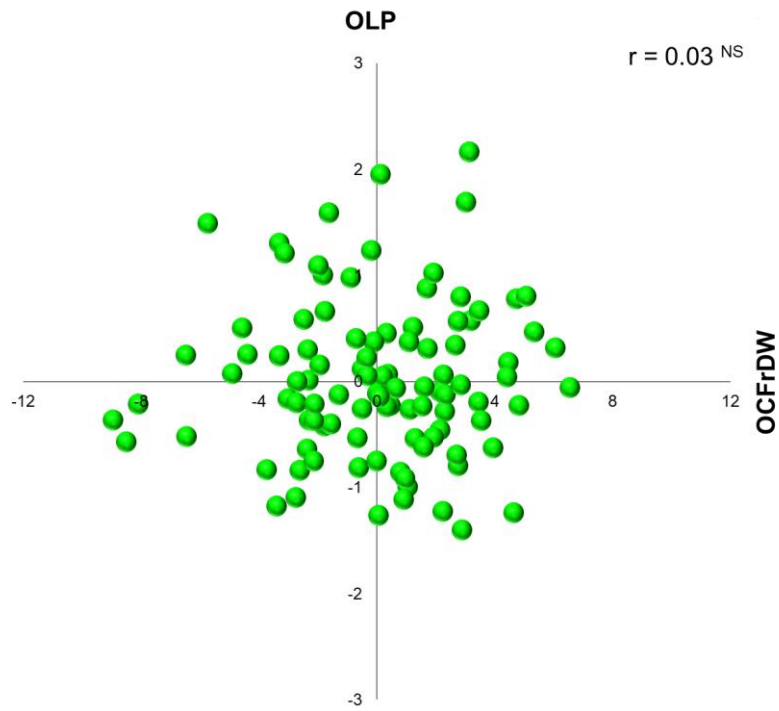

**Figure S2** The best linear unbiased prediction (BLUP) graph for the effect of environment on OCFrDW (oil content in fruit dry weight) vs FrFW (fruit fresh weight) and OLP (oleic/(linoleic + palmitic) acids ratio) vs OCFrDW interactions.

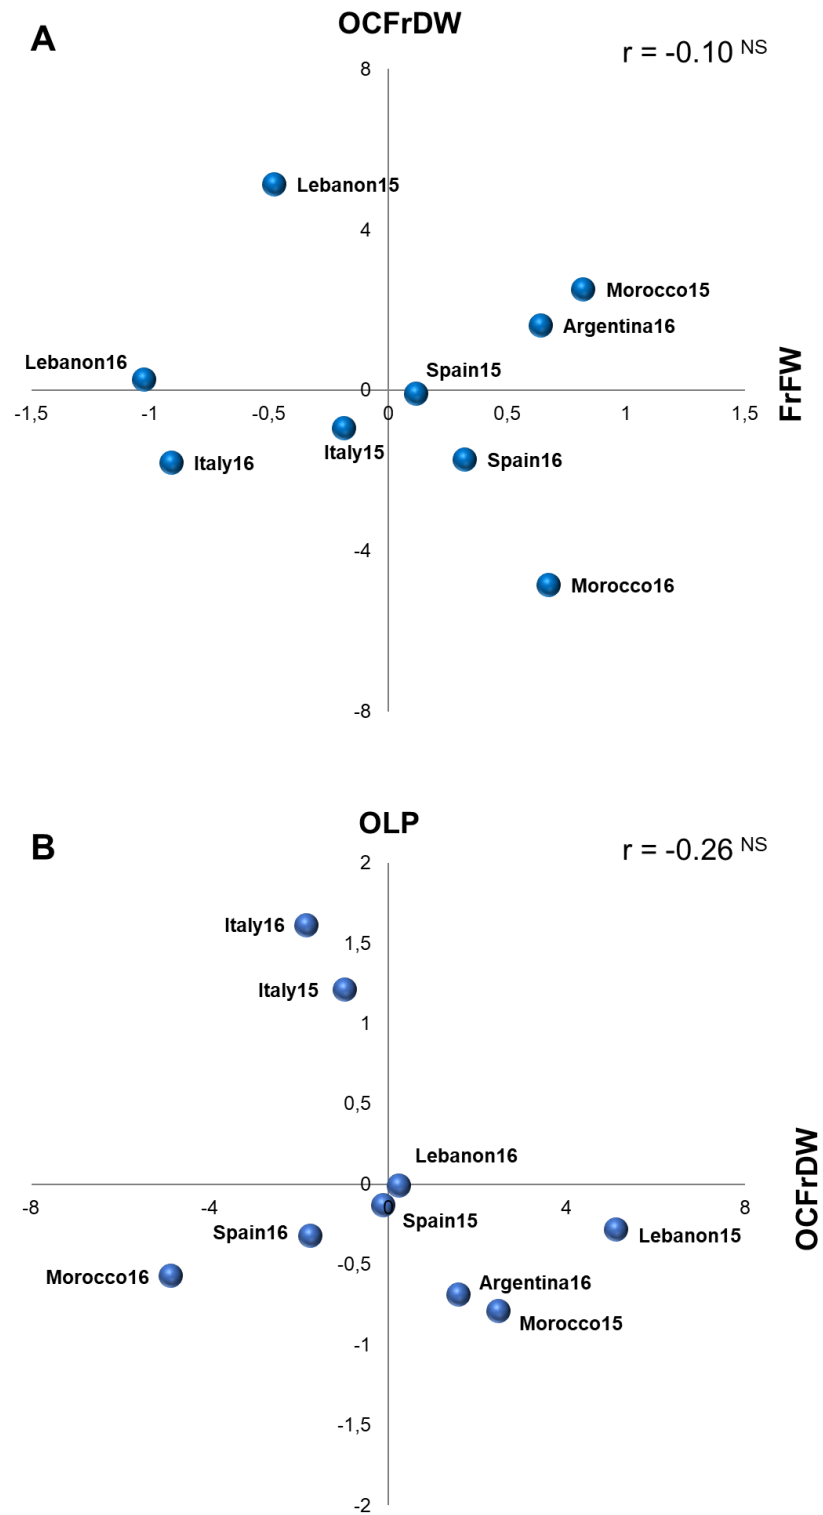

**Table S1** Trait variability among 14 olive cultivars in each environment. The trait variation was calculated as CV<sub>trait</sub> %.

| <b>Trait</b>                     | <b>Italy15</b> | <b>Italy16</b> | <b>Morocco15</b> | <b>Morocco16</b> | <b>Spain15</b> | <b>Spain16</b> |
|----------------------------------|----------------|----------------|------------------|------------------|----------------|----------------|
| <b>FrFW<sup>†</sup></b>          |                |                |                  |                  |                |                |
| Min                              | 0.6            | 0.9            | 1.1              | 0.9              | 0.9            | 0.7            |
| Max                              | 5.6            | 4.9            | 8.5              | 6.2              | 6.6            | 5.6            |
| Mean                             | 2.7            | 2.2            | 3.4              | 3.3              | 3.0            | 3.2            |
| CV <sub>trait</sub> <sup>a</sup> | <b>48.6</b>    | <b>53.8</b>    | <b>55.0</b>      | <b>43.0</b>      | <b>49.4</b>    | <b>42.5</b>    |
| <b>FrM</b>                       |                |                |                  |                  |                |                |
| Min                              | 57.0           | 40.9           | 40.5             | 46.4             | 55.4           | 57.9           |
| Max                              | 71.7           | 57.7           | 64.3             | 65.4             | 72.1           | 68.7           |
| Mean                             | 62.3           | 48.7           | 53.7             | 57.4             | 63.5           | 63.3           |
| CV <sub>trait</sub>              | <b>6.5</b>     | <b>9.4</b>     | <b>12.8</b>      | <b>10.0</b>      | <b>7.3</b>     | <b>4.7</b>     |
| <b>OCFrDW</b>                    |                |                |                  |                  |                |                |
| Min                              | 29.2           | 29.5           | 30.5             | 25.9             | 36.8           | 29.3           |
| Max                              | 49.0           | 51.2           | 55.1             | 45.9             | 61.4           | 55.2           |
| Mean                             | 41.0           | 40.1           | 45.8             | 37.3             | 44.9           | 41.3           |
| CV <sub>trait</sub>              | <b>15.8</b>    | <b>15.1</b>    | <b>15.0</b>      | <b>17.8</b>      | <b>14.6</b>    | <b>15.4</b>    |
| <b>C16:0</b>                     |                |                |                  |                  |                |                |
| Min                              | 10.7           | 10.1           | 15.0             | 12.6             | 12.4           | 12.8           |
| Max                              | 16.7           | 14.8           | 21.4             | 21.7             | 21.2           | 21.6           |
| Mean                             | 13.8           | 12.1           | 17.5             | 15.9             | 15.7           | 16.1           |
| CV <sub>trait</sub>              | <b>13.5</b>    | <b>11.0</b>    | <b>10.5</b>      | <b>15.9</b>      | <b>14.6</b>    | <b>14.7</b>    |
| <b>C18:1</b>                     |                |                |                  |                  |                |                |
| Min                              | 69.0           | 69.7           | 51.0             | 53.9             | 48.9           | 45.8           |
| Max                              | 80.9           | 84.0           | 75.0             | 76.8             | 81.6           | 79.2           |
| Mean                             | 76.3           | 79.1           | 62.8             | 65.3             | 68.8           | 67.3           |
| CV <sub>trait</sub>              | <b>4.7</b>     | <b>4.6</b>     | <b>12.2</b>      | <b>10.5</b>      | <b>11.7</b>    | <b>11.7</b>    |
| <b>C18:2</b>                     |                |                |                  |                  |                |                |
| Min                              | 2.4            | 1.9            | 5.1              | 4.7              | 2.1            | 2.9            |
| Max                              | 10.5           | 11.7           | 25.8             | 21.8             | 25.2           | 28.4           |
| Mean                             | 5.1            | 5.2            | 15.0             | 14.0             | 11.5           | 13.0           |
| CV <sub>trait</sub>              | <b>38.6</b>    | <b>44.3</b>    | <b>41.7</b>      | <b>38.1</b>      | <b>51.2</b>    | <b>46.7</b>    |
| <b>OLP</b>                       |                |                |                  |                  |                |                |
| Min                              | 2.6            | 2.6            | 1.2              | 1.3              | 1.1            | 0.9            |
| Max                              | 5.5            | 6.6            | 3.7              | 4.4              | 5.6            | 4.7            |
| Mean                             | 4.2            | 4.8            | 2.1              | 2.4              | 2.9            | 2.5            |
| CV <sub>trait</sub>              | <b>21.2</b>    | <b>22.4</b>    | <b>36.9</b>      | <b>40.7</b>      | <b>42.6</b>    | <b>35.7</b>    |

<sup>†</sup>FrFW expressed as g of weight, all other values expressed as percentage.

Abbreviations: FrFW, fruit fresh weight, FrM, fruit moisture, OCFrDW, oil content in fruit dry weight, C16:0, palmitic acid, C18:1, oleic acid, C18:2, linoleic acid and OLP, oleic/(linoleic + palmitic) acids ratio.

**Table S2** The phenotypic variation of each cultivar in six different environments (the measurements expressed in percentage, except FrFW, which expressed in g). The trait variation was calculated as CV<sub>trait</sub> % and the total trait variation over six different environments (CV<sub>m</sub> %).

| Trait               | Arbequina   | Bianchera   | Carolea     | Coratina    | Empeltre    | Frantoio    | Koroneiki   | Lastovka    | Leccino     | Maurino     | Moraiolo    | Oblica      | Pical       | Salonenque  | CV <sub>m</sub> |
|---------------------|-------------|-------------|-------------|-------------|-------------|-------------|-------------|-------------|-------------|-------------|-------------|-------------|-------------|-------------|-----------------|
| <b>FrFW</b>         |             |             |             |             |             |             |             |             |             |             |             |             |             |             |                 |
| Min                 | 1.1         | 2.7         | 2.5         | 1.5         | 2.5         | 1.5         | 0.6         | 1.3         | 1.0         | 1.3         | 1.4         | 4.9         | 1.7         | 2.0         |                 |
| Max                 | 2.5         | 4.0         | 6.6         | 3.9         | 4.1         | 2.9         | 1.1         | 2.8         | 3.8         | 2.8         | 2.8         | 8.5         | 6.0         | 4.5         |                 |
| Mean                | 1.7         | 3.4         | 4.9         | 2.9         | 3.2         | 2.4         | 0.8         | 2.4         | 2.5         | 2.2         | 2.2         | 6.2         | 3.4         | 3.6         |                 |
| CV <sub>trait</sub> | <b>30.9</b> | <b>11.9</b> | <b>27.9</b> | <b>25.9</b> | <b>18.5</b> | <b>19.4</b> | <b>19.8</b> | <b>21.4</b> | <b>33.8</b> | <b>20.7</b> | <b>19.5</b> | <b>18.3</b> | <b>48.6</b> | <b>22.3</b> | <b>13.77</b>    |
| <b>FrM</b>          |             |             |             |             |             |             |             |             |             |             |             |             |             |             |                 |
| Min                 | 47.1        | 49.5        | 40.5        | 43.4        | 55.5        | 40.9        | 47.4        | 51.8        | 47.8        | 54.8        | 41.2        | 54.8        | 45.6        | 47.8        |                 |
| Max                 | 72.1        | 61.5        | 64.3        | 65.4        | 67.8        | 59.0        | 63.8        | 65.1        | 66.3        | 71.7        | 63.2        | 68.6        | 62.8        | 68.7        |                 |
| Mean                | 56.7        | 57.4        | 54.7        | 55.5        | 62.3        | 53.3        | 58.7        | 60.7        | 57.4        | 63.4        | 52.9        | 63.9        | 57.3        | 59.7        |                 |
| CV <sub>trait</sub> | <b>16.8</b> | <b>7.0</b>  | <b>15.8</b> | <b>11.9</b> | <b>6.9</b>  | <b>12.1</b> | <b>9.2</b>  | <b>7.4</b>  | <b>10.9</b> | <b>10.0</b> | <b>17.4</b> | <b>6.8</b>  | <b>10.3</b> | <b>12.4</b> | <b>10.88</b>    |
| <b>OCFrDW</b>       |             |             |             |             |             |             |             |             |             |             |             |             |             |             |                 |
| Min                 | 31.6        | 34.3        | 38.7        | 33.4        | 33.4        | 32.9        | 29.2        | 26.0        | 29.5        | 36.5        | 25.9        | 32.9        | 30.3        | 40.0        |                 |
| Max                 | 42.5        | 61.4        | 56.4        | 46.4        | 43.1        | 47.7        | 42.3        | 47.3        | 46.2        | 52.8        | 53.3        | 48.2        | 52.3        | 47.5        |                 |
| Mean                | 39.0        | 49.6        | 47.8        | 41.0        | 37.7        | 42.4        | 34.2        | 38.0        | 40.0        | 42.3        | 42.1        | 43.8        | 41.2        | 44.9        |                 |
| CV <sub>trait</sub> | <b>9.3</b>  | <b>16.9</b> | <b>13.0</b> | <b>12.8</b> | <b>8.8</b>  | <b>11.0</b> | <b>16.8</b> | <b>20.6</b> | <b>14.6</b> | <b>14.5</b> | <b>19.4</b> | <b>11.5</b> | <b>16.9</b> | <b>5.3</b>  | <b>8.41</b>     |
| <b>C16:0</b>        |             |             |             |             |             |             |             |             |             |             |             |             |             |             |                 |
| Min                 | 13.7        | 13.3        | 12.9        | 10.1        | 11.2        | 11.6        | 10.6        | 11.1        | 13.1        | 12.9        | 12.9        | 10.9        | 10.8        | 14.7        |                 |
| Max                 | 21.7        | 17.9        | 18.2        | 16.7        | 17.9        | 17.9        | 15.4        | 15.2        | 16.7        | 17.5        | 20.7        | 18.0        | 15.0        | 21.6        |                 |
| Mean                | 17.3        | 15.4        | 15.9        | 12.7        | 15.3        | 15.0        | 13.1        | 13.4        | 15.6        | 15.8        | 17.1        | 14.2        | 12.9        | 19.0        |                 |
| CV <sub>trait</sub> | <b>16.4</b> | <b>9.2</b>  | <b>13.4</b> | <b>15.6</b> | <b>17.6</b> | <b>13.7</b> | <b>14.6</b> | <b>9.0</b>  | <b>7.8</b>  | <b>10.6</b> | <b>14.6</b> | <b>15.4</b> | <b>10.5</b> | <b>14.4</b> | <b>12.55</b>    |
| <b>C18:1</b>        |             |             |             |             |             |             |             |             |             |             |             |             |             |             |                 |
| Min                 | 58.8        | 61.7        | 62.0        | 51.8        | 63.5        | 60.4        | 73.6        | 63.0        | 60.5        | 62.1        | 55.2        | 52.5        | 74.8        | 45.8        |                 |
| Max                 | 76.6        | 76.2        | 78.6        | 83.0        | 82.8        | 81.0        | 84.0        | 78.4        | 78.1        | 77.8        | 78.3        | 79.6        | 83.8        | 69.7        |                 |
| Mean                | 66.7        | 70.1        | 69.8        | 74.5        | 70.4        | 71.1        | 77.8        | 69.1        | 71.9        | 68.9        | 66.6        | 66.4        | 79.4        | 56.4        |                 |
| CV <sub>trait</sub> | <b>10.6</b> | <b>7.0</b>  | <b>8.5</b>  | <b>14.0</b> | <b>11.3</b> | <b>10.0</b> | <b>4.5</b>  | <b>7.1</b>  | <b>7.9</b>  | <b>8.2</b>  | <b>11.7</b> | <b>14.7</b> | <b>3.7</b>  | <b>16.8</b> | <b>9.04</b>     |
| <b>C18:2</b>        |             |             |             |             |             |             |             |             |             |             |             |             |             |             |                 |
| Min                 | 5.3         | 5.4         | 4.3         | 3.8         | 2.8         | 3.6         | 2.7         | 7.1         | 3.6         | 5.8         | 5.6         | 4.9         | 1.9         | 10.5        |                 |
| Max                 | 17.9        | 14.3        | 12.9        | 20.8        | 16.1        | 16.6        | 7.0         | 17.3        | 16.3        | 17.4        | 19.9        | 24.9        | 5.1         | 28.4        |                 |
| Mean                | 12.3        | 9.2         | 9.0         | 8.0         | 10.5        | 10.3        | 4.9         | 13.0        | 8.2         | 11.4        | 12.5        | 15.5        | 3.2         | 20.0        |                 |
| CV <sub>trait</sub> | <b>38.8</b> | <b>38.2</b> | <b>31.6</b> | <b>75.4</b> | <b>52.2</b> | <b>46.2</b> | <b>31.9</b> | <b>33.1</b> | <b>49.4</b> | <b>37.9</b> | <b>42.0</b> | <b>48.3</b> | <b>39.4</b> | <b>33.3</b> | <b>40.75</b>    |
| <b>OLP</b>          |             |             |             |             |             |             |             |             |             |             |             |             |             |             |                 |
| Min                 | 1.5         | 1.9         | 2.0         | 1.2         | 1.9         | 1.8         | 3.3         | 1.9         | 1.9         | 1.8         | 1.4         | 1.2         | 3.7         | 0.9         |                 |
| Max                 | 4.0         | 3.9         | 4.6         | 6.0         | 5.9         | 5.1         | 6.3         | 4.3         | 4.3         | 4.2         | 4.2         | 4.7         | 6.6         | 2.6         |                 |
| Mean                | 2.5         | 3.0         | 3.0         | 4.1         | 3.3         | 3.1         | 4.5         | 2.8         | 3.2         | 2.7         | 2.5         | 2.7         | 5.1         | 1.6         |                 |
| CV <sub>trait</sub> | <b>40.5</b> | <b>23.7</b> | <b>31.3</b> | <b>36.5</b> | <b>51.9</b> | <b>40.4</b> | <b>23.9</b> | <b>29.8</b> | <b>24.2</b> | <b>30.4</b> | <b>40.0</b> | <b>51.7</b> | <b>18.8</b> | <b>44.8</b> | <b>32.65</b>    |

Abbreviations: FrFW, fruit fresh weight, FrM, fruit moisture, OCFrDW, oil content in fruit dry weight, C16:0, palmitic acid, C18:1, oleic acid, C18:2, linoleic acid and OLP, oleic/(linoleic + palmitic) acids ratio.

**Table S3** Pearson correlation coefficients among the evaluated traits by cultivar. Significant correlation coefficients are indicated in bold.

| Cultivar   | Trait  | FrFW         | FrM   | OCFrDW | C16:0        | C18:1 | C18:2 |
|------------|--------|--------------|-------|--------|--------------|-------|-------|
| Arbequina  | FrM    | 0.22         |       |        |              |       |       |
| Carolea    | FrM    | 0.34         |       |        |              |       |       |
| Coratina   | FrM    | 0.85         |       |        |              |       |       |
| Empeltre   | FrM    | 0.11         |       |        |              |       |       |
| Frantoio   | FrM    | 0.73         |       |        |              |       |       |
| Bianchera  | FrM    | 0.67         |       |        |              |       |       |
| Koroneiki  | FrM    | -0.24        |       |        |              |       |       |
| Lastovka   | FrM    | -0.02        |       |        |              |       |       |
| Leccino    | FrM    | 0.51         |       |        |              |       |       |
| Maurino    | FrM    | 0.76         |       |        |              |       |       |
| Moraiolo   | FrM    | 0.39         |       |        |              |       |       |
| Oblica     | FrM    | 0.38         |       |        |              |       |       |
| Picual     | FrM    | 0.70         |       |        |              |       |       |
| Salonenque | FrM    | 0.03         |       |        |              |       |       |
| Arbequina  | OCFrDW | -0.86        | -0.01 |        |              |       |       |
| Carolea    | OCFrDW | 0.58         | 0.04  |        |              |       |       |
| Coratina   | OCFrDW | 0.68         | 0.51  |        |              |       |       |
| Empeltre   | OCFrDW | -0.41        | -0.33 |        |              |       |       |
| Frantoio   | OCFrDW | 0.84         | 0.70  |        |              |       |       |
| Bianchera  | OCFrDW | 0.26         | 0.17  |        |              |       |       |
| Koroneiki  | OCFrDW | 0.36         | -0.50 |        |              |       |       |
| Lastovka   | OCFrDW | 0.66         | -0.29 |        |              |       |       |
| Leccino    | OCFrDW | 0.71         | 0.30  |        |              |       |       |
| Maurino    | OCFrDW | 0.48         | -0.03 |        |              |       |       |
| Moraiolo   | OCFrDW | -0.25        | 0.04  |        |              |       |       |
| Oblica     | OCFrDW | -0.90        | -0.02 |        |              |       |       |
| Picual     | OCFrDW | 0.92         | 0.46  |        |              |       |       |
| Salonenque | OCFrDW | 0.69         | 0.23  |        |              |       |       |
| Arbequina  | C16:0  | 0.86         | -0.13 | -0.70  |              |       |       |
| Carolea    | C16:0  | 0.81         | -0.18 | 0.46   |              |       |       |
| Coratina   | C16:0  | 0.56         | 0.14  | 0.62   |              |       |       |
| Empeltre   | C16:0  | <b>-0.96</b> | -0.04 | 0.41   |              |       |       |
| Frantoio   | C16:0  | 0.65         | 0.39  | 0.61   |              |       |       |
| Bianchera  | C16:0  | 0.49         | 0.28  | -0.28  |              |       |       |
| Koroneiki  | C16:0  | 0.38         | 0.57  | -0.42  |              |       |       |
| Lastovka   | C16:0  | -0.29        | 0.70  | -0.15  |              |       |       |
| Leccino    | C16:0  | 0.75         | 0.63  | 0.82   |              |       |       |
| Maurino    | C16:0  | 0.88         | 0.48  | 0.65   |              |       |       |
| Moraiolo   | C16:0  | 0.51         | 0.12  | 0.48   |              |       |       |
| Oblica     | C16:0  | <b>0.92</b>  | 0.62  | -0.79  |              |       |       |
| Picual     | C16:0  | 0.90         | 0.85  | 0.79   |              |       |       |
| Salonenque | C16:0  | 0.59         | 0.61  | 0.41   |              |       |       |
| Arbequina  | C18:1  | -0.85        | -0.06 | 0.58   | <b>-0.97</b> |       |       |
| Carolea    | C18:1  | -0.84        | 0.17  | -0.43  | <b>-0.99</b> |       |       |
| Coratina   | C18:1  | -0.40        | 0.09  | -0.48  | <b>-0.96</b> |       |       |
| Empeltre   | C18:1  | <b>0.93</b>  | -0.04 | -0.38  | <b>-0.96</b> |       |       |

|            |       |             |       |       |              |              |              |
|------------|-------|-------------|-------|-------|--------------|--------------|--------------|
| Frantoio   | C18:1 | -0.43       | -0.33 | -0.42 | <b>-0.95</b> |              |              |
| Bianchera  | C18:1 | -0.40       | -0.12 | 0.61  | -0.91        |              |              |
| Koroneiki  | C18:1 | -0.05       | -0.74 | 0.77  | -0.87        |              |              |
| Lastovka   | C18:1 | 0.01        | -0.81 | 0.26  | -0.88        |              |              |
| Leccino    | C18:1 | -0.79       | 0.10  | -0.66 | -0.49        |              |              |
| Maurino    | C18:1 | -0.58       | -0.20 | -0.33 | -0.82        |              |              |
| Moraiolo   | C18:1 | -0.59       | 0.18  | -0.21 | -0.90        |              |              |
| Oblica     | C18:1 | -0.84       | -0.61 | 0.72  | <b>-0.92</b> |              |              |
| Picual     | C18:1 | -0.90       | -0.82 | -0.68 | -0.90        |              |              |
| Salonenque | C18:1 | -0.67       | -0.66 | -0.53 | <b>-0.98</b> |              |              |
| Arbequina  | C18:2 | 0.87        | 0.08  | -0.62 | <b>0.96</b>  | <b>-1.00</b> |              |
| Carolea    | C18:2 | 0.91        | -0.03 | 0.47  | <b>0.96</b>  | <b>-0.98</b> |              |
| Coratina   | C18:2 | 0.37        | -0.14 | 0.54  | <b>0.93</b>  | <b>-0.98</b> |              |
| Empeltre   | C18:2 | -0.89       | 0.00  | 0.34  | <b>0.92</b>  | <b>-0.99</b> |              |
| Frantoio   | C18:2 | 0.31        | 0.32  | 0.37  | 0.89         | <b>-0.98</b> |              |
| Bianchera  | C18:2 | 0.39        | -0.05 | -0.64 | 0.76         | <b>-0.94</b> |              |
| Koroneiki  | C18:2 | 0.09        | 0.58  | -0.73 | 0.86         | <b>-0.96</b> |              |
| Lastovka   | C18:2 | 0.39        | 0.75  | -0.11 | 0.61         | -0.90        |              |
| Leccino    | C18:2 | 0.69        | -0.26 | 0.52  | 0.30         | <b>-0.97</b> |              |
| Maurino    | C18:2 | 0.39        | 0.10  | 0.08  | 0.62         | <b>-0.96</b> |              |
| Moraiolo   | C18:2 | 0.56        | -0.25 | 0.18  | 0.85         | <b>-0.99</b> |              |
| Oblica     | C18:2 | 0.77        | 0.60  | -0.67 | 0.88         | <b>-0.99</b> |              |
| Picual     | C18:2 | 0.90        | 0.68  | 0.73  | 0.79         | <b>-0.95</b> |              |
| Salonenque | C18:2 | 0.71        | 0.67  | 0.59  | <b>0.95</b>  | <b>-0.99</b> |              |
| Arbequina  | OLP   | -0.85       | -0.10 | 0.56  | <b>-0.94</b> | <b>1.00</b>  | <b>-1.00</b> |
| Carolea    | OLP   | -0.90       | 0.03  | -0.54 | <b>-0.98</b> | <b>0.98</b>  | <b>-0.99</b> |
| Coratina   | OLP   | -0.51       | -0.10 | -0.62 | <b>-0.98</b> | <b>0.95</b>  | <b>-0.94</b> |
| Empeltre   | OLP   | <b>0.93</b> | 0.00  | -0.43 | <b>-0.97</b> | <b>1.00</b>  | <b>-0.98</b> |
| Frantoio   | OLP   | -0.45       | -0.43 | -0.55 | <b>-0.93</b> | <b>0.97</b>  | <b>-0.98</b> |
| Bianchera  | OLP   | -0.52       | -0.17 | 0.54  | -0.88        | <b>0.98</b>  | <b>-0.96</b> |
| Koroneiki  | OLP   | -0.24       | -0.69 | 0.61  | <b>-0.95</b> | <b>0.97</b>  | <b>-0.95</b> |
| Lastovka   | OLP   | -0.11       | -0.87 | 0.25  | -0.80        | <b>0.98</b>  | <b>-0.95</b> |
| Leccino    | OLP   | -0.85       | -0.03 | -0.74 | -0.61        | <b>0.96</b>  | <b>-0.93</b> |
| Maurino    | OLP   | -0.64       | -0.29 | -0.31 | -0.81        | <b>0.99</b>  | <b>-0.94</b> |
| Moraiolo   | OLP   | -0.72       | 0.00  | -0.14 | -0.91        | <b>0.98</b>  | <b>-0.96</b> |
| Oblica     | OLP   | -0.71       | -0.70 | 0.57  | -0.87        | <b>0.97</b>  | <b>-0.99</b> |
| Picual     | OLP   | -0.91       | -0.89 | -0.73 | <b>-0.95</b> | <b>0.98</b>  | <b>-0.92</b> |
| Salonenque | OLP   | -0.66       | -0.64 | -0.54 | <b>-0.98</b> | <b>1.00</b>  | <b>-0.98</b> |

Abbreviations: FrFW, fruit fresh weight, FrM, fruit moisture, OCFrDW, oil content in fruit dry weight, C16:0, palmitic acid, C18:1, oleic acid, C18:2, linoleic acid and OLP, oleic/(linoleic + palmitic) acids ratio.



**Table S4** List of cultivars collected from nine different environments.

| Cultivar                      | Country of origin | Italy15 | Italy16 | Morocco15 | Morocco16 | Spain15 | Spain16 | Lebanon15 | Lebanon16 | Argentina16 |
|-------------------------------|-------------------|---------|---------|-----------|-----------|---------|---------|-----------|-----------|-------------|
| Adramitini-DA12I              | Greece            | X       | X       |           |           |         |         |           |           |             |
| Agrestigna                    | Italy             | X       |         |           |           |         |         |           |           |             |
| Amygdalolia Nana              | Greece            |         |         |           |           | X       | X       |           |           |             |
| Arauco                        | Argentina         |         | X       |           |           | X       | X       |           |           | X           |
| <u>Arbequina</u> <sup>†</sup> | Spain             | X       | X       | X         | X         | X       | X       |           |           | X           |
| Ascolana Tenera               | Italy             |         |         | X         | X         | X       | X       | X         | X         | X           |
| Ayrouni                       | Lebanon           |         |         | X         |           |         |         |           |           |             |
| Ayvalik                       | Turkey            |         |         |           |           | X       | X       |           |           |             |
| Baladi Ain Baal               | Lebanon           |         |         |           |           | X       | X       |           |           |             |
| Baladi Fekhe                  | Lebanon           |         |         | X         | X         |         |         |           |           |             |
| Baladi Kana                   | Lebanon           |         |         |           |           |         |         |           | X         |             |
| Bella di Cerignola            | Italy             |         |         | X         |           |         |         | X         |           |             |
| Bella di Spagna               | Italy             |         |         | X         |           |         |         |           |           |             |
| <u>Bianchera</u>              | Italy             | X       | X       | X         | X         | X       | X       | X         | X         |             |
| Biancolilla                   | Italy             |         | X       | X         | X         |         |         | X         | X         |             |
| Biancolilla nana              | Italy             | X       | X       |           |           |         |         |           |           |             |
| Blanqueta                     | Spain             |         |         | X         | X         | X       | X       |           |           | X           |
| Bosana                        | Italy             |         |         |           |           | X       | X       |           |           |             |
| Bouteillan                    | France            |         |         | X         | X         | X       | X       |           |           |             |
| Branquita                     | Portugal          | X       | X       |           |           |         |         |           |           |             |
| Bujuk Topakislak              | Turkey            | X       | X       |           |           |         |         |           |           |             |
| Canino                        | Italy             | X       | X       |           |           | X       | X       | X         | X         | X           |
| <u>Carolea</u>                | Italy             | X       | X       | X         | X         | X       | X       |           |           |             |
| Chalkidikis                   | Greece            | X       | X       | X         | X         |         |         |           |           |             |
| Changlot Real                 | Spain             | X       | X       |           |           | X       |         |           |           | X           |
| Chemlali                      | Tunisia           | X       | X       |           |           |         |         |           |           |             |
| Chetoui                       | Tunisia           |         | X       | X         | X         | X       | X       |           |           |             |
| Cipressino                    | Italy             | X       | X       |           |           | X       | X       |           |           |             |
| Cobrancosa                    | Portugal          | X       | X       | X         | X         | X       |         |           |           |             |
| <u>Coratina</u>               | Italy             | X       | X       | X         | X         | X       | X       |           | X         |             |
| Cornicabra                    | Spain             |         |         | X         | X         | X       |         |           |           |             |
| Domat                         | Turkey            | X       | X       |           |           |         | X       |           |           |             |
| Dritta                        | Italy             | X       | X       | X         | X         |         |         |           |           |             |
| <u>Empeltre</u>               | Spain             | X       | X       | X         | X         | X       | X       |           |           | X           |
| Fishomi                       | Iran              | X       | X       |           |           | X       | X       |           |           |             |
| <u>Frantoio</u>               | Italy             | X       | X       | X         | X         | X       | X       | X         | X         | X           |
| Galega Vulgar                 | Portugal          |         |         | X         | X         | X       | X       |           |           |             |
| Galego                        | Portugal          |         | X       |           |           |         |         |           |           |             |

|                       |          |   |   |   |   |   |   |   |   |   |
|-----------------------|----------|---|---|---|---|---|---|---|---|---|
| Gordal Sevillana      | Spain    | X | X | X | X | X | X |   |   |   |
| Grappolo              | Italy    |   |   | X |   |   |   |   |   |   |
| Grossa di spagna      | Italy    |   |   | X |   |   |   |   |   |   |
| Hojiblanca            | Spain    | X | X | X | X | X |   | X | X |   |
| Itrana                | Italy    |   |   | X | X | X | X |   |   |   |
| Izmir Sofralik        | Turkey   |   | X |   |   |   | X |   |   |   |
| Kalamata              | Greece   | X | X |   |   |   |   | X | X |   |
| Kalokerida            | Greece   |   |   | X | X | X | X |   |   |   |
| Kerkiras              | Greece   |   |   |   |   | X | X |   |   |   |
| Konservolia           | Greece   | X | X |   |   | X | X | X | X |   |
| <u>Koroneiki</u>      | Greece   | X | X | X | X | X | X |   |   |   |
| <u>Lastovka</u>       | Croatia  | X | X | X | X | X | X |   |   |   |
| <u>Leccino</u>        | Italy    | X | X | X | X | X | X | X | X | X |
| Leccio del Corno      | Italy    |   | X | X | X |   |   | X | X | X |
| Lechin de Sevilla     | Spain    | X | X | X |   | X | X | X | X |   |
| Lucques               | France   |   |   |   |   | X | X |   |   |   |
| Madural               | Portugal |   |   | X | X |   |   |   |   |   |
| Majorca               | Italy    |   | X | X | X |   |   |   |   |   |
| Manzanilla Cacerena   | Spain    | X |   | X | X | X | X |   |   |   |
| Manzanilla de Agua    | Spain    |   |   | X |   |   |   |   |   |   |
| Manzanilla de Jaen    | Spain    | X |   |   |   |   |   |   |   |   |
| Manzanilla de Sevilla | Spain    | X | X | X | X | X | X |   | X |   |
| Massabi               | Syria    |   |   |   |   |   |   | X | X |   |
| Mastoidis             | Greece   |   |   | X | X |   |   |   |   |   |
| <u>Maurino</u>        | Italy    | X | X | X | X | X | X | X | X | X |
| Megaritiki            | Greece   | X |   |   |   |   |   |   |   |   |
| Memecik               | Turkey   |   |   |   |   | X |   |   |   |   |
| Meski                 | Tunisia  | X | X | X |   | X | X |   |   |   |
| <u>Moraiolo</u>       | Italy    | X | X | X | X | X | X | X | X |   |
| Moresca               | Italy    | X | X | X | X |   |   |   |   |   |
| Morisca               | Spain    |   | X | X | X | X |   |   |   |   |
| Morrut                | Spain    | X | X |   |   |   |   |   |   |   |
| Nabali                | Jordan   |   |   |   |   |   |   | X | X |   |
| Nocellara del Belice  | Italy    |   |   | X | X |   |   | X | X |   |
| Nociara               | Italy    | X | X | X | X |   |   | X | X |   |
| <u>Oblica</u>         | Croatia  | X | X | X | X | X | X |   |   |   |
| Ottobratica           | Italy    |   |   | X | X |   |   |   |   |   |
| Ottobratica-DA12I     | Italy    | X | X |   |   |   |   |   |   |   |
| Passalunara           | Italy    | X | X |   |   |   |   |   |   |   |
| Pendolino             | Italy    | X | X | X | X | X | X | X | X |   |
| Peranzana             | Italy    | X | X |   |   |   |   |   |   |   |

|                                     |           |           |           |           |           |           |           |           |           |           |
|-------------------------------------|-----------|-----------|-----------|-----------|-----------|-----------|-----------|-----------|-----------|-----------|
| Picholine du Gard                   | France    |           |           | X         | X         |           |           |           |           |           |
| Picholine Languedoc                 | France    | X         | X         | X         | X         | X         | X         | X         | X         | X         |
| Picholine Marocaine                 | Morocco   | X         | X         | X         | X         | X         |           | X         | X         |           |
| <u>Picual</u>                       | Spain     | X         | X         | X         | X         | X         | X         | X         | X         | X         |
| Picudo                              | Spain     | X         | X         | X         | X         | X         | X         |           |           |           |
| Rachati                             | Greece    |           |           |           |           | X         | X         |           |           |           |
| Ravece                              | Italy     | X         |           |           |           |           |           |           |           |           |
| Remnani                             | Lebanon   |           |           | X         |           |           |           | X         |           | X         |
| Rkhami                              | Tunisia   |           |           | X         | X         |           |           |           |           |           |
| Rotondella                          | Italy     |           |           | X         | X         |           |           |           |           |           |
| Roumani Kana                        | Lebanon   |           |           | X         | X         |           |           |           |           |           |
| Rowghani                            | Iran      |           |           |           |           | X         |           |           |           |           |
| Rowghani-I                          | Iran      | X         |           |           |           |           |           |           |           |           |
| <u>Salonenque</u>                   | France    | X         | X         | X         | X         | X         | X         |           |           |           |
| Santa Caterina                      | Italy     |           |           |           |           |           |           |           |           | X         |
| Sant Agostino                       | Italy     |           |           | X         | X         |           |           | X         |           | X         |
| Sevillenca                          | Spain     |           |           | X         | X         | X         | X         |           |           |           |
| Shami                               | Jordan    |           |           | X         | X         |           |           |           |           |           |
| Sigoise                             | Algeria   |           |           | X         | X         |           |           | X         |           | X         |
| Sorani                              | Syria     |           |           |           |           |           |           | X         |           | X         |
| Souri                               | Lebanon   |           |           | X         |           |           |           |           |           |           |
| Tanche                              | France    | X         | X         |           |           |           |           |           |           |           |
| Toffahi                             | Egypt     |           |           | X         | X         | X         |           | X         |           |           |
| Tonda Iblea                         | Italy     | X         | X         |           |           |           |           |           |           | X         |
| Uovo di Piccione                    | Italy     |           | X         | X         | X         |           |           |           |           |           |
| Uslu                                | Turkey    |           |           |           |           | X         | X         |           |           |           |
| Valanolia                           | Greece    |           |           |           |           | X         | X         |           |           |           |
| Vera                                | Spain     |           |           | X         | X         | X         | X         |           |           |           |
| Vera-Umbria                         | Italy     |           | X         |           |           |           |           |           |           |           |
| Verdale                             | France    |           |           |           |           | X         | X         | X         |           | X         |
| Verdial de velez Malaga             | Spain     | X         | X         |           |           |           |           |           |           |           |
| Villalonga                          | Spain     |           |           |           |           |           |           |           |           | X         |
| Zaituna                             | Italy     | X         |           |           |           |           |           |           |           |           |
| Zaity                               | Syria     | X         | X         |           |           |           |           |           |           |           |
| <b>Total accessions/environment</b> |           | <b>55</b> | <b>58</b> | <b>65</b> | <b>56</b> | <b>55</b> | <b>48</b> | <b>28</b> | <b>31</b> | <b>12</b> |
| <b>Total cultivars/collection</b>   | <b>16</b> | <b>63</b> | <b>65</b> | <b>57</b> | <b>33</b> | <b>12</b> |           |           |           |           |

† Underlined cultivars represent those sampled from three collections (Italy, Morocco and Spain) and from two years (six environmental conditions).

**Table S5** The temperature variation in ten different environments.

| Temperature (°C)    | Italy15 | Italy16 | Morocco15 | Morocco16 | Spain15 | Spain16 | Lebanon15 | Lebanon16 | Argentina15 <sup>†</sup> | Argentina16 |
|---------------------|---------|---------|-----------|-----------|---------|---------|-----------|-----------|--------------------------|-------------|
| <b>Maximum</b>      |         |         |           |           |         |         |           |           |                          |             |
| Average annual Tmax | 21.4    | 21.8    | 27.1      | 27.6      | 26.2    | 25.2    | 24.9      | 24.8      | 28.4                     | 27.8        |
| ±SD                 | 7.3     | 7.9     | 7.2       | 7.5       | 7.9     | 8.1     | 5.2       | 4.9       | 6.3                      | 7.5         |
| <b>Minimum</b>      |         |         |           |           |         |         |           |           |                          |             |
| Average annual Tmin | 7.5     | 6.2     | 12.4      | 11.6      | 11.0    | 12.0    | 14.9      | 16.2      | 11.3                     | 10.3        |
| ±SD                 | 6.2     | 6.2     | 6.1       | 6.0       | 6.4     | 5.7     | 5.5       | 5.5       | 7.4                      | 7.2         |
| <b>Amplitude</b>    |         |         |           |           |         |         |           |           |                          |             |
| Average annual Tamp | 13.9    | 15.6    | 14.6      | 16.0      | 15.2    | 13.2    | 10.0      | 8.6       | 17.1                     | 17.5        |
| ±SD                 | 2.5     | 2.8     | 2.4       | 2.2       | 3.1     | 3.2     | 1.6       | 2.5       | 3.2                      | 4.1         |

<sup>†</sup>Data on a new environment (Env10-A15) has been included, being ten the total number of environments under study.

**Table S6** Geo-climate data of olive germplasm collections evaluated in the study.

| Germplasm collections | Geographical area    | Rainfall (mm) |      | Altitude (m) | Latitude      | Longitude     | Irrigated/Rainfed (mm/year) <sup>†</sup> |
|-----------------------|----------------------|---------------|------|--------------|---------------|---------------|------------------------------------------|
|                       |                      | 2015          | 2016 |              |               |               |                                          |
| IOGC                  | Enna (Italy)         | 988           | 736  | 767          | 37°. 30'. 51" | 14°. 17'. 46" | rainfed                                  |
| WOGB-INRA             | Tassaout (Morocco)   | 207           | 188  | 465          | 32°. 01'. 48" | 07°. 14'. 24" | 224                                      |
| WOGB-IFAPA            | Cordoba (Spain)      | 337           | 615  | 102          | 37°. 51'. 38" | 04°. 48'. 29" | 290                                      |
| OC-LARI               | Akkar (Lebanon)      | 591           | 279  | 18           | 34°. 31'. 14" | 35°. 59'. 19" | rainfed                                  |
| OCC-INTA              | San Juan (Argentina) | 87            | 98   | 591          | 31°. 31'. 28" | 68°. 23'. 52" | 600                                      |

<sup>†</sup> The same amount of irrigation was applied for both years of experiment.

**Table S7** Specific information of olive germplasm collections evaluated in the study.

| <b>Germplasm collection</b> | <b>Trees distance (m)</b> | <b>Tree age</b> | <b>Fertilization regime</b>                               | <b>Soil type</b> | <b>Disease and pest control</b>                                                                                                                                                                                                                                          |
|-----------------------------|---------------------------|-----------------|-----------------------------------------------------------|------------------|--------------------------------------------------------------------------------------------------------------------------------------------------------------------------------------------------------------------------------------------------------------------------|
| <b>WOGB-IFAPA</b>           | 7x7                       | 32              | Yearly fertilization by NPK following leaf analysis       | Sandy loam       | No significant pest problems are recorded in WOGB-IFAPA collection where the incidence of olive fly is irrelevant. Phytosanitary treatments were applied on the basis of the monitoring of pests and diseases and on the weather conditions.                             |
| <b>WOGB-INRA</b>            | 7x4                       | 16              | Yearly fertilization by NPK                               | Silty sandy      | In this collection, no significant pest problems are recorded. As a preventive action, insecticides are applied 2 times a year to control the <i>Prays oleae</i> , <i>Euphyllura olivina</i> and <i>Bractocera oleae</i>                                                 |
| <b>IOGC</b>                 | 5x6                       | 15              | Biannual fertilization by NPK following leaf analysis     | Clay sandy       | Insecticides are applied 2 times a year if the presence of <i>Bractocera oleae</i> , has been confirmed. Treatments with copper-based products in spring and autumn to control <i>Spilocaea oleaginea</i> , based on the presence of this disease and weather condition. |
| <b>OC-LARI</b>              | 5x6                       | 35              | Biannual fertilization by NPK, MgSO <sub>4</sub> and Iron | Clay sandy       | In few cases, treatment for <i>Bractocera oleae</i> , <i>Prays olea</i> and <i>Zeuzera pyrina</i>                                                                                                                                                                        |
| <b>OCC-INTA</b>             | 10x10                     | 75              | Biannual fertilization applying 500 g N per tree          | Sandy loam       | In this collection, no significant disease problems are recorded. Particularly, the olive fly does not constitute a pest of interest in this region. As a preventive action, a systemic insecticide is applied twice a year to control <i>Pollinia pollini</i>           |
